# Supplementary material for: Void layer optimization in constant-composition yolk–shell SiO@C anodes for improved lithium storage performance
Source: Royal Society of Chemistry journal article supplement (doi:10.1039/d5nj04256a), 2025-12-11
Supplement: d5nj04256a1.pdf [file d5nj04256a1.pdf]

## Supporting Information

### Void layer optimization in constant-composition yolk-shell SiO@C anodes for improved lithium storage performance

Jiayi Wu, Ziyi Zhou, Zhifeng Li\*, Xiaojuan Liu, Yiming Wang, Chengzhou Li,  
Chunxiang Wang\*

*School of Materials Science and Engineering, Jiangxi Provincial Key Laboratory of  
Power Batteries & Energy Storage Materials, Jiangxi University of Science and  
Technology, Ganzhou 341000, P. R. China.*

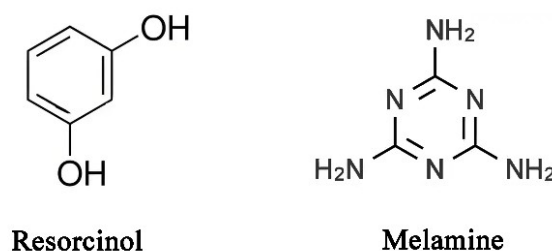

Fig. S1. Schematic illustration of the molecular structures of resorcinol and melamine.

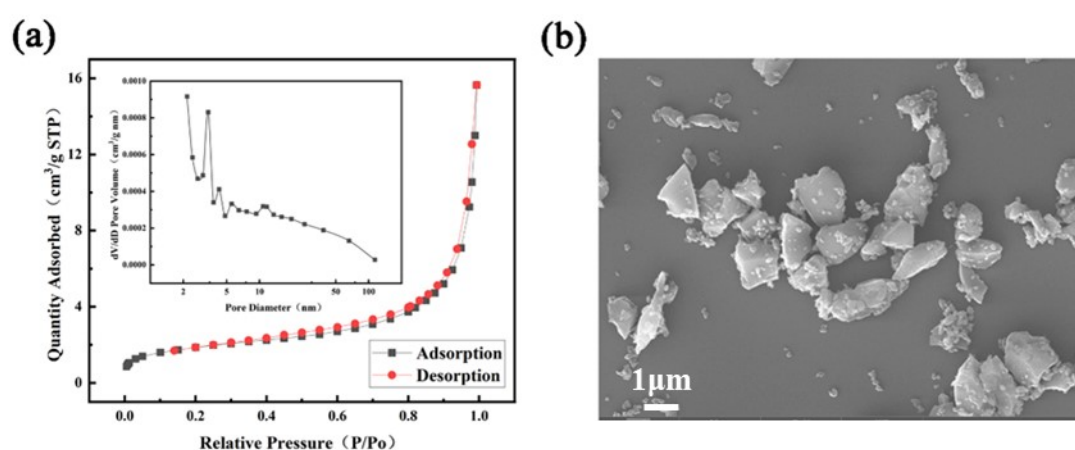

Fig. S2. (a) Nitrogen adsorption-desorption isotherm of the pristine SiO; (b) SEM image of the pristine SiO.
